# Supplementary material
Source: Research Square preprint supplement (doi:10.21203/rs.3.rs-9177469/v1)
Supplement: Supplementary file 1 [file a8ac191039f84da4361675a3.docx]

**Comparative Analysis of Rhodamine B Adsorption Kinetics and Mechanism on Graphene Oxide and Reduced Graphene Oxide**

Anshu Tyagia, c, Bhupendra Chudasamab, c and, Amjad Alia, c*

*aDepartment of Chemistry and Biochemistry, Thapar Institute of Engineering & Technology (TIET), Patiala, Punjab, India-147004*

*bDepartment of Physics and Material Science, Thapar Institute of Engineering & Technology (TIET), Patiala, Punjab, India-147004*

*cAffiliated Faculty- TIET- Virginia Tech, Centre of Excellence in Emerging Materials, Thapar Institute of Engineering & Technology (TIET), Patiala, Punjab, India-147004*

*Corresponding author email:* [*amjadali@thapar.edu*](mailto:amjadali@thapar.edu)

**Control Experiment**

A control experiment was conducted using graphite powder under identical conditions (RhB concentration: 5 ppm, adsorbent dose: 10 mg, pH: 7, time: 20 min). As seen in Fig. S1, there was very little dye removal over the course of 20 minutes, as evidenced by the slight decline in the RhB absorption peak at 555 nm. Because of its non-oxidized, planar structure and absence of oxygen-containing functional groups, graphite has a low adsorption effectiveness (Alshammari 2023). This is because it decreases surface activity and electrostatic interactions with cationic dye molecules. This difference emphasizes how important surface functionalization and defect locations are for improved RhB adsorption in GO and rGO.


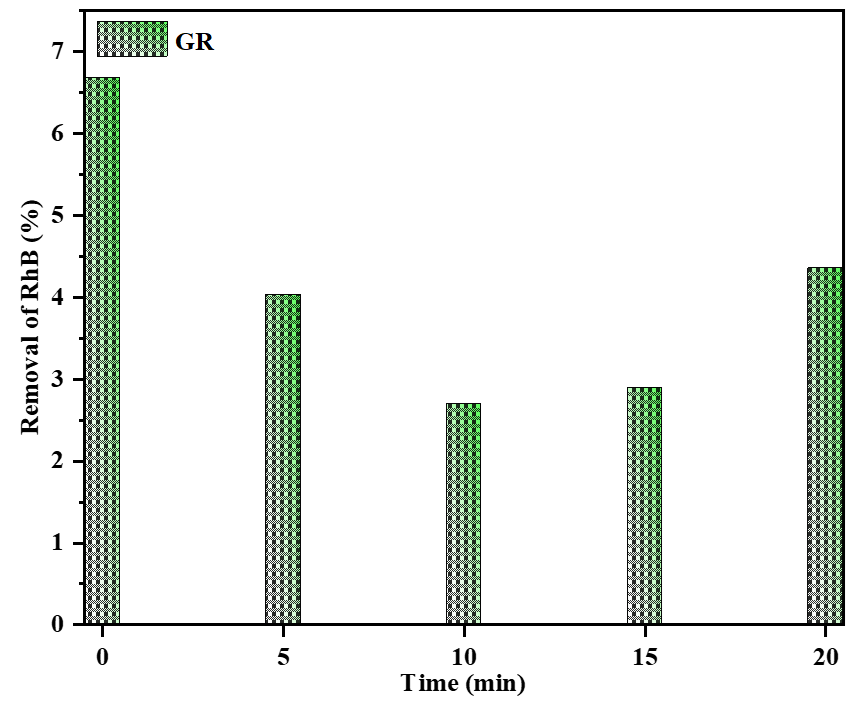


**Fig. S1** UV–Vis spectra of Rhodamine B in the presence of graphite over time.

**Energy Dispersive X-ray Spectroscopy (EDS)**


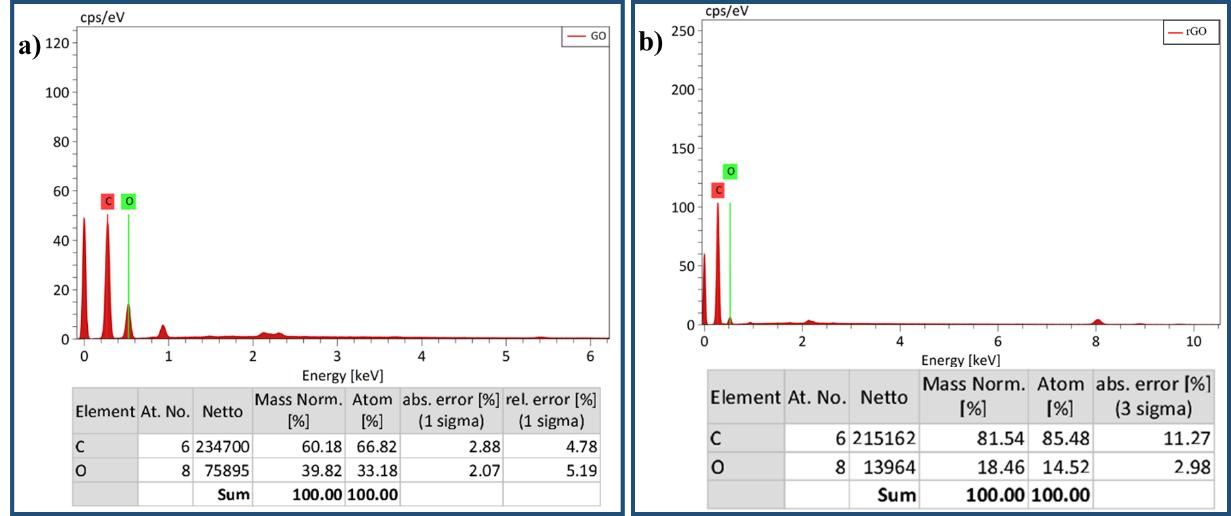


**Fig. S2** EDS image of (a) GO and, (b) rGO.

**Reusability Studies**

The dye removal effectiveness of the rGO decreased from 99.83 % to 42.37 % after the fourth cycle, and it was regenerated at pH 8 since the least amount of adsorption was seen at pH=10.


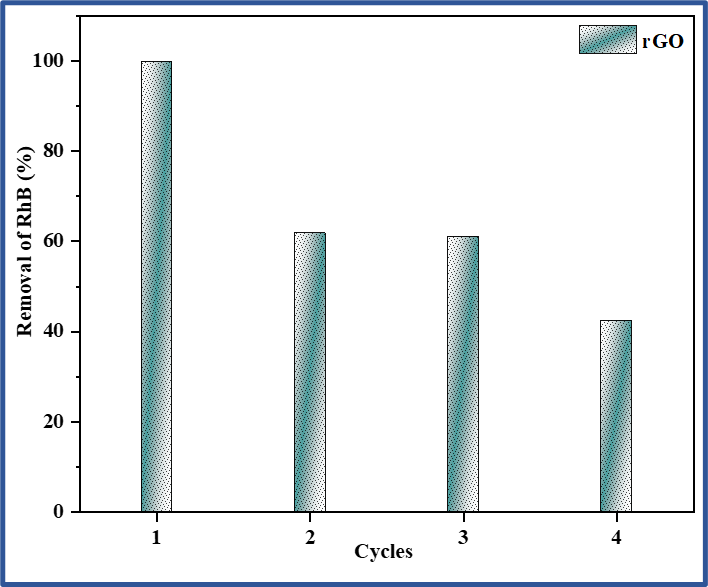


**Fig. S3** Reusability of rGO on RhB.

**Table S1.** Key intermolecular interaction distances between Rhodamine B (RhB) and graphene oxide (GO) / reduced graphene oxide (rGO) obtained from optimized DFT geometries. The table summarizes different interaction types and corresponding representative atomic pairs with their distance ranges (Å).

| **System** | **Interaction type** | **Representative atoms** | **Distance (Å)** |
| --- | --- | --- | --- |
| RhB-GO | Hydrogen bonding | O-H···O (RhB-GO) | 2.2-2.7 |
| RhB-GO | Electrostatic/weak H-bonding | N (RhB) - O (GO) | 2.6-3.8 |
| RhB-GO | Long-range π-π/electrostatic interaction | C (RhB aromatic ring) - C (GO basal plane) | 6.0-6.3 |
| RhB-rGO | Long-range π-π interaction | C (RhB aromatic ring) - C (rGO basal plane) | 4.8-5.4 |
| RhB-rGO | Weak electrostatic interaction | N (RhB) - O (rGO) | 2.3-6.7 |

**References**

Alshammari, A.S. (2023). Controlling dye adsorption kinetics of graphene oxide nano-sheets via optimized oxidation treatment. Crystals, 14:49. <https://doi.org/10.3390/cryst14010049>
